# Supplementary material for: A Bayesian Framework Based on Gaussian Mixture Model and Radial Basis Function Fisher Discriminant Analysis for Flood Spatial Prediction (BayGmmKda V1.1)
Source: Copernicus journal article supplement (doi:10.5194/gmd-2016-311), 2017-01-17
Supplement: Supplementary file 2 [file TestData.xlsx]

## Sheet: Sheet1
0.99	0.01	0.23	0.26	0.77	0.85	0.01	0.85	0.81	0.01	-1
0.71	0.57	0.55	0.75	0.77	0.71	0.01	0.85	0.72	0.15	-1
0.85	0.43	0.55	0.5	0.34	0.57	0.21	0.71	0.63	0.01	-1
0.85	0.29	0.45	0.75	0.66	0.71	0.21	0.71	0.72	0.15	-1
0.15	0.57	0.01	0.5	0.55	0.43	0.4	0.85	0.72	0.15	-1
0.85	0.43	0.77	0.26	0.55	0.43	0.6	0.43	0.72	0.29	-1
0.01	0.99	0.01	0.5	0.88	0.01	0.4	0.71	0.81	0.29	-1
0.01	0.99	0.01	0.5	0.01	0.01	0.79	0.29	0.1	0.15	1
0.29	0.57	0.01	0.26	0.23	0.29	0.79	0.43	0.81	0.15	1
0.15	0.71	0.01	0.75	0.01	0.57	0.6	0.01	0.72	0.15	1
0.01	0.85	0.01	0.5	0.01	0.29	0.79	0.29	0.81	0.15	1
0.15	0.57	0.01	0.5	0.23	0.43	0.4	0.71	0.28	0.15	1
0.01	0.85	0.01	0.5	0.01	0.43	0.6	0.43	0.72	0.15	1
0.01	0.85	0.01	0.5	0.01	0.01	0.4	0.43	0.72	0.01	1
