# Supplementary material for: A Bayesian Framework Based on Gaussian Mixture Model and Radial Basis Function Fisher Discriminant Analysis for Flood Spatial Prediction (BayGmmKda V1.1)
Source: Copernicus journal article supplement (doi:10.5194/gmd-2016-311), 2017-01-17
Supplement: Supplementary file 3 [file TrainData.xlsx]

## Sheet: Sheet1
0.85	0.43	0.77	0.26	0.34	0.43	0.6	0.57	0.37	0.57	1
0.01	0.99	0.01	0.5	0.23	0.29	0.79	0.85	0.37	0.57	1
0.85	0.29	0.66	0.5	0.34	0.43	0.6	0.15	0.46	0.85	1
0.01	0.99	0.01	0.26	0.34	0.15	0.6	0.43	0.46	0.99	1
0.85	0.15	0.12	0.99	0.55	0.57	0.4	0.01	0.37	0.99	1
0.85	0.43	0.45	0.26	0.23	0.01	0.4	0.29	0.37	0.99	1
0.85	0.43	0.55	0.26	0.23	0.57	0.21	0.43	0.46	0.99	1
0.85	0.29	0.45	0.75	0.23	0.71	0.4	0.71	0.46	0.99	1
0.01	0.99	0.01	0.5	0.12	0.71	0.21	0.15	0.37	0.99	1
0.99	0.43	0.77	0.5	0.23	0.43	0.79	0.01	0.37	0.99	1
0.99	0.01	0.12	0.75	0.34	0.43	0.6	0.43	0.63	0.99	1
0.29	0.43	0.01	0.26	0.23	0.29	0.79	0.01	0.81	0.57	1
0.01	0.99	0.01	0.5	0.23	0.43	0.6	0.43	0.72	0.57	1
0.29	0.71	0.23	0.26	0.12	0.01	0.6	0.85	0.72	0.43	1
0.99	0.29	0.55	0.75	0.23	0.29	0.6	0.57	0.72	0.43	1
0.99	0.15	0.55	0.75	0.12	0.43	0.6	0.15	0.72	0.29	1
0.99	0.29	0.66	0.26	0.23	0.43	0.6	0.01	0.81	0.43	1
0.71	0.71	0.88	0.75	0.23	0.15	0.4	0.85	0.81	0.29	1
0.71	0.15	0.12	0.75	0.45	0.57	0.6	0.43	0.72	0.43	1
0.85	0.43	0.45	0.26	0.23	0.57	0.4	0.71	0.81	0.29	1
0.01	0.85	0.01	0.5	0.12	0.15	0.6	0.85	0.81	0.15	1
0.71	0.43	0.45	0.26	0.23	0.43	0.4	0.71	0.81	0.15	1
0.85	0.29	0.34	0.75	0.23	0.57	0.4	0.43	0.81	0.29	1
0.29	0.71	0.23	0.5	0.12	0.01	0.6	0.01	0.81	0.15	1
0.43	0.71	0.34	0.26	0.12	0.01	0.4	0.15	0.81	0.15	1
0.01	0.99	0.01	0.5	0.12	0.01	0.6	0.15	0.81	0.15	1
0.29	0.57	0.01	0.5	0.12	0.43	0.6	0.43	0.72	0.29	1
0.01	0.99	0.01	0.5	0.01	0.29	0.6	0.01	0.1	0.15	1
0.01	0.99	0.01	0.5	0.01	0.01	0.6	0.57	0.81	0.15	1
0.85	0.29	0.45	0.26	0.12	0.43	0.79	0.01	0.81	0.15	1
0.57	0.29	0.01	0.75	0.12	0.43	0.79	0.01	0.81	0.15	1
0.01	0.85	0.01	0.5	0.12	0.15	0.6	0.01	0.81	0.15	1
0.01	0.99	0.01	0.5	0.01	0.43	0.6	0.57	0.72	0.15	1
0.01	0.85	0.01	0.5	0.01	0.01	0.6	0.01	0.1	0.15	1
0.57	0.57	0.45	0.75	0.23	0.01	0.6	0.01	0.81	0.15	1
0.85	0.43	0.77	0.26	0.12	0.57	0.6	0.43	0.1	0.15	1
0.85	0.43	0.55	0.26	0.12	0.43	0.6	0.57	0.72	0.15	1
0.43	0.29	0.01	0.26	0.12	0.43	0.6	0.01	0.81	0.01	1
0.01	0.85	0.01	0.5	0.01	0.15	0.6	0.01	0.72	0.15	1
0.01	0.99	0.01	0.5	0.01	0.01	0.6	0.71	0.81	0.01	1
0.01	0.99	0.01	0.5	0.01	0.15	0.6	0.43	0.72	0.15	1
0.01	0.85	0.01	0.5	0.01	0.15	0.79	0.71	0.72	0.15	1
0.71	0.57	0.55	0.26	0.23	0.29	0.6	0.15	0.46	0.01	1
0.71	0.29	0.23	0.5	0.23	0.71	0.4	0.71	0.72	0.15	1
0.01	0.85	0.01	0.5	0.12	0.01	0.6	0.43	0.72	0.15	1
0.01	0.99	0.01	0.5	0.01	0.43	0.4	0.71	0.72	0.01	1
0.01	0.99	0.01	0.5	0.01	0.01	0.6	0.43	0.72	0.15	1
0.71	0.57	0.77	0.26	0.12	0.01	0.6	0.01	0.37	0.15	1
0.71	0.29	0.23	0.01	0.12	0.01	0.6	0.57	0.72	0.15	1
0.85	0.29	0.34	0.75	0.34	0.43	0.4	0.71	0.63	0.15	1
0.01	0.85	0.01	0.5	0.01	0.43	0.6	0.43	0.01	0.01	1
0.01	0.99	0.01	0.5	0.01	0.01	0.6	0.01	0.72	0.01	1
0.15	0.57	0.01	0.26	0.45	0.43	0.79	0.15	0.72	0.15	1
0.01	0.99	0.01	0.5	0.01	0.57	0.79	0.43	0.72	0.01	1
0.85	0.43	0.66	0.26	0.99	0.43	0.01	0.71	0.54	0.99	-1
0.57	0.43	0.12	0.5	0.34	0.15	0.6	0.99	0.37	0.57	-1
0.99	0.15	0.45	0.26	0.77	0.29	0.4	0.85	0.46	0.43	-1
0.01	0.85	0.01	0.5	0.12	0.01	0.4	0.71	0.37	0.71	-1
0.85	0.29	0.34	0.75	0.77	0.71	0.01	0.71	0.54	0.71	-1
0.01	0.85	0.01	0.5	0.55	0.57	0.01	0.85	0.63	0.99	-1
0.43	0.71	0.23	0.5	0.34	0.15	0.6	0.71	0.72	0.85	-1
0.99	0.01	0.34	0.75	0.45	0.57	0.21	0.85	0.81	0.71	-1
0.71	0.71	0.99	0.26	0.55	0.57	0.21	0.99	0.72	0.71	-1
0.29	0.71	0.12	0.75	0.45	0.99	0.01	0.71	0.99	0.29	-1
0.85	0.29	0.34	0.75	0.77	0.71	0.01	0.71	0.81	0.43	-1
0.85	0.29	0.45	0.26	0.66	0.71	0.01	0.85	0.81	0.71	-1
0.99	0.15	0.45	0.75	0.34	0.43	0.4	0.85	0.81	0.43	-1
0.57	0.57	0.34	0.01	0.77	0.99	0.01	0.43	0.37	0.57	-1
0.01	0.85	0.01	0.5	0.23	0.43	0.4	0.85	0.81	0.29	-1
0.57	0.29	0.01	0.75	0.34	0.57	0.6	0.57	0.72	0.43	-1
0.85	0.15	0.12	0.75	0.45	0.57	0.01	0.15	0.72	0.15	-1
0.71	0.85	0.99	0.26	0.34	0.57	0.4	0.71	0.72	0.29	-1
0.99	0.15	0.34	0.75	0.23	0.15	0.79	0.85	0.81	0.43	-1
0.57	0.43	0.23	0.26	0.45	0.57	0.4	0.43	0.72	0.29	-1
0.43	0.43	0.01	0.75	0.23	0.15	0.21	0.85	0.72	0.15	-1
0.43	0.29	0.01	0.75	0.34	0.57	0.21	0.71	0.9	0.15	-1
0.29	0.57	0.12	0.26	0.34	0.01	0.4	0.99	0.46	0.29	-1
0.85	0.43	0.55	0.26	0.45	0.15	0.6	0.57	0.9	0.15	-1
0.57	0.43	0.12	0.26	0.23	0.71	0.01	0.57	0.72	0.29	-1
0.29	0.43	0.01	0.26	0.66	0.57	0.21	0.85	0.9	0.15	-1
0.43	0.71	0.55	0.26	0.12	0.43	0.6	0.85	0.28	0.15	-1
0.57	0.57	0.34	0.75	0.12	0.71	0.01	0.99	0.72	0.01	-1
0.71	0.43	0.34	0.75	0.12	0.57	0.21	0.85	0.81	0.15	-1
0.85	0.43	0.55	0.75	0.55	0.57	0.21	0.71	0.37	0.15	-1
0.43	0.57	0.12	0.26	0.12	0.29	0.4	0.71	0.72	0.01	-1
0.71	0.85	0.99	0.75	0.23	0.71	0.21	0.71	0.72	0.15	-1
0.85	0.43	0.55	0.75	0.23	0.57	0.4	0.71	0.81	0.15	-1
0.01	0.85	0.01	0.5	0.23	0.85	0.01	0.57	0.72	0.15	-1
0.99	0.29	0.66	0.75	0.23	0.99	0.01	0.57	0.72	0.01	-1
0.29	0.57	0.01	0.5	0.66	0.71	0.01	0.57	0.72	0.15	-1
0.99	0.15	0.45	0.5	0.12	0.43	0.4	0.43	0.72	0.01	-1
0.29	0.99	0.66	0.26	0.23	0.99	0.01	0.71	0.81	0.01	-1
0.85	0.43	0.66	0.26	0.55	0.01	0.6	0.85	0.72	0.01	-1
0.85	0.43	0.66	0.75	0.12	0.85	0.21	0.43	0.63	0.01	-1
0.85	0.29	0.55	0.26	0.55	0.01	0.4	0.71	0.37	0.15	-1
0.43	0.57	0.12	0.75	0.45	0.57	0.6	0.57	0.63	0.15	-1
0.85	0.43	0.66	0.26	0.23	0.57	0.21	0.57	0.63	0.01	-1
0.71	0.43	0.45	0.75	0.45	0.57	0.6	0.57	0.72	0.15	-1
0.85	0.57	0.77	0.01	0.88	0.29	0.21	0.57	0.72	0.15	-1
0.99	0.29	0.66	0.26	0.66	0.15	0.6	0.57	0.37	0.15	-1
0.71	0.43	0.55	0.26	0.77	0.01	0.4	0.71	0.81	0.15	-1
0.71	0.15	0.12	0.75	0.77	0.43	0.4	0.71	0.72	0.15	-1
0.85	0.29	0.55	0.26	0.88	0.57	0.21	0.99	0.81	0.15	-1
0.71	0.43	0.45	0.26	0.34	0.15	0.6	0.57	0.72	0.15	-1
0.85	0.15	0.23	0.26	0.55	0.99	0.01	0.29	0.37	0.15	-1
0.99	0.29	0.66	0.75	0.66	0.43	0.4	0.71	0.81	0.29	-1
0.85	0.43	0.77	0.26	0.77	0.71	0.4	0.43	0.72	0.15	-1
0.71	0.43	0.23	0.26	0.77	0.57	0.6	0.71	0.81	0.29	-1
0.29	0.57	0.01	0.75	0.45	0.57	0.4	0.71	0.37	0.71	1
0.99	0.29	0.55	0.75	0.34	0.57	0.21	0.85	0.37	0.85	1
0.71	0.57	0.66	0.75	0.23	0.57	0.4	0.71	0.46	0.99	1
0.71	0.57	0.66	0.26	0.34	0.57	0.4	0.85	0.37	0.99	1
0.85	0.43	0.77	0.75	0.12	0.43	0.6	0.01	0.72	0.57	1
0.71	0.85	0.99	0.75	0.23	0.57	0.01	0.15	0.81	0.29	1
0.01	0.99	0.01	0.5	0.01	0.43	0.6	0.71	0.1	0.15	1
0.01	0.99	0.01	0.5	0.12	0.57	0.6	0.43	0.81	0.15	1
0.01	0.99	0.01	0.5	0.01	0.29	0.79	0.43	0.81	0.15	1
0.01	0.99	0.01	0.5	0.01	0.01	0.79	0.29	0.1	0.15	1
0.29	0.57	0.01	0.26	0.23	0.29	0.79	0.43	0.81	0.15	1
0.15	0.71	0.01	0.75	0.01	0.57	0.6	0.01	0.72	0.15	1
0.01	0.85	0.01	0.5	0.01	0.29	0.79	0.29	0.81	0.15	1
0.15	0.57	0.01	0.5	0.23	0.43	0.4	0.71	0.28	0.15	1
0.01	0.85	0.01	0.5	0.01	0.43	0.6	0.43	0.72	0.15	1
0.01	0.85	0.01	0.5	0.01	0.01	0.4	0.43	0.72	0.01	1
0.01	0.99	0.01	0.5	0.01	0.15	0.6	0.57	0.72	0.15	1
0.01	0.99	0.01	0.5	0.12	0.01	0.4	0.57	0.72	0.15	1
0.71	0.43	0.55	0.26	0.12	0.43	0.4	0.01	0.37	0.15	1
0.43	0.43	0.12	0.75	0.01	0.15	0.4	0.43	0.72	0.01	1
0.85	0.43	0.55	0.75	0.34	0.57	0.6	0.85	0.63	0.15	1
0.01	0.99	0.01	0.5	0.01	0.29	0.4	0.01	0.01	0.01	1
0.57	0.57	0.34	0.26	0.99	0.85	0.01	0.85	0.37	0.99	-1
0.71	0.71	0.88	0.26	0.45	0.71	0.4	0.57	0.37	0.71	-1
0.99	0.15	0.55	0.75	0.55	0.29	0.6	0.71	0.37	0.57	-1
0.85	0.29	0.55	0.26	0.34	0.43	0.4	0.71	0.37	0.85	-1
0.57	0.29	0.01	0.75	0.45	0.71	0.01	0.29	0.54	0.85	-1
0.99	0.43	0.99	0.26	0.45	0.57	0.21	0.01	0.72	0.57	-1
0.85	0.29	0.34	0.26	0.34	0.43	0.6	0.99	0.72	0.85	-1
0.01	0.85	0.01	0.5	0.45	0.15	0.4	0.85	0.72	0.57	-1
